# Supplementary material for: Innovative Strategy for 3D Transfection of Primary Human Stem Cells with BMP-2 Expressing Plasmid DNA: A Clinically Translatable Strategy for Ex Vivo Gene Therapy
Source: MDPI journal article supplement (doi:10.3390/ijms20010056), 2018-12-23
Supplement: s1 [file s1]

## **Supplementary Information**

### **Innovative strategy for 3D transfection of primary human stem cells with BMP-2 expressing plasmid DNA: A clinically translatable strategy for bone regeneration**

**Maruthibabu Paidikondala<sup>1</sup>, Sandeep Kadekar<sup>1</sup>, Oommen P. Varghese<sup>1\*</sup>**

**\*Corresponding author**

1 Translational Chemical Biology Laboratory, Department of Chemistry, Ångström Laboratory, Uppsala University, 751 21, Uppsala, Sweden.

E-mail: oommen.varghese@kemi.uu.se

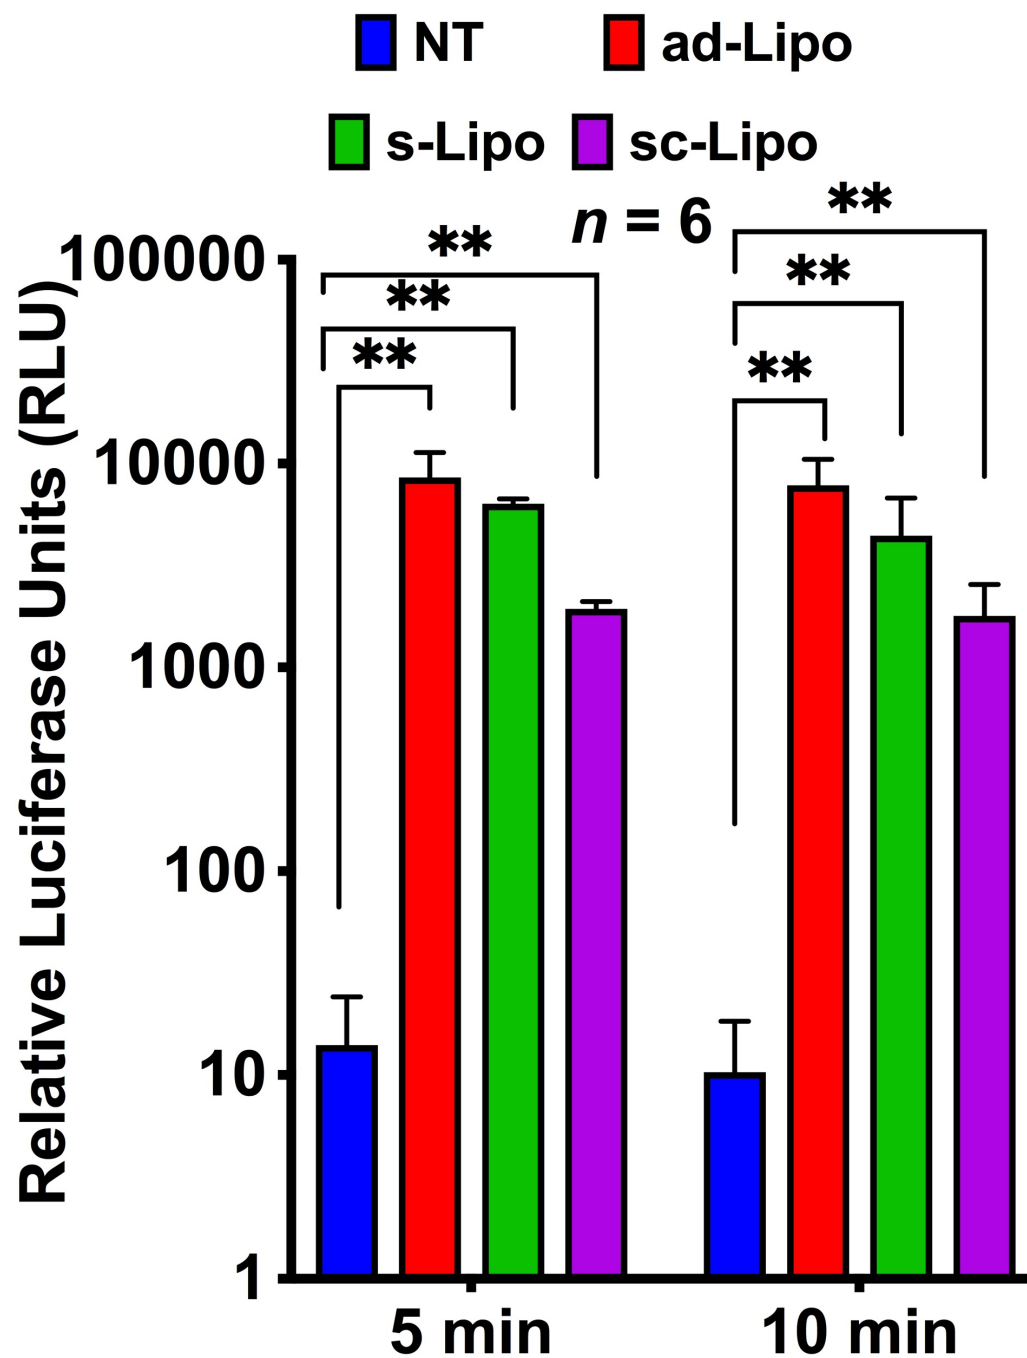

**Fig. S1** Luciferase plasmid expression analysis using ONE-Glo™ Luciferase Assay System in hMSCs transfected with the assistance of Lipofectamine 2000 reagent in 2D. Mean values  $\pm$  SD of 2 independent experiments done in triplicates ( $n = 6$ ) are shown. Statistical analysis was performed using one-way ANOVA with Bonferroni's multiple comparison corrections ( $*p < 0.0001$ ).

| <b>Transfection condition</b>                                                        | <b>Number of cells<br/>Per well/gel</b>                          | <b>Volume of<br/>Lipofectamine<br/>Per well/gel</b> | <b>Total amount of<br/>Plasmid DNA<br/>transferred</b> |
|--------------------------------------------------------------------------------------|------------------------------------------------------------------|-----------------------------------------------------|--------------------------------------------------------|
| <b>Adherent (2D)</b>                                                                 | 35000 cells per well in a 24-well plate                          | 1.5 $\mu$ L                                         | 100 ng                                                 |
| <b>Suspension in 2D</b>                                                              | 35000 cells per well in a 24-well plate                          | 1.5 $\mu$ L                                         | 100 ng                                                 |
| <b>Suspension followed<br/>by centrifugation in 2D</b>                               | 35000 cells per well in a 24-well plate                          | 1.5 $\mu$ L                                         | 100 ng                                                 |
| <b>Suspension/direct<br/>addition in 3D</b><br>(gene expression analysis)            | 200000 cells per 200 $\mu$ L gel in a well<br>of a 24-well plate | 6 $\mu$ L                                           | 500 ng                                                 |
| <b>Suspension followed<br/>by centrifugation in 3D</b><br>(gene expression analysis) | 200000 cells per 200 $\mu$ L gel in a well<br>of a 24-well plate | 6 $\mu$ L                                           | 500 ng                                                 |
| <b>Suspension/direct<br/>addition in 3D</b><br>(cell viability)                      | 100000 cells per 100 $\mu$ L gel in a well<br>of a 96-well plate | 3 $\mu$ L                                           | 250 ng                                                 |
| <b>Suspension followed<br/>by centrifugation in 3D</b><br>(cell viability)           | 100000 cells per 100 $\mu$ L gel in a well<br>of a 96-well plate | 3 $\mu$ L                                           | 250 ng                                                 |

**Table S1.** Table showing different volumes of Lipofectamine 2000 reagent, and concentrations of plasmid DNA used to transfect cells in different experimental conditions in 2D and 3D.
